# Supplementary material for: The Impact of Heat Stress on Morpho-Physiological Response and Expression of Specific Genes in the Heat Stress-Responsive Transcriptional Regulatory Network in Brassica oleracea
Source: MDPI journal article supplement (doi:10.3390/plants10061064), 2021-05-26
Supplement: s1 [file s1]

## Article

# The Impact of Heat Stress on Morpho-Physiological Response and Expression of Specific Genes in the Heat Stress-Responsive Transcriptional Regulatory Network in *Brassica oleracea*

Mahdi Moradpour <sup>1</sup>, Siti Nor Akmar Abdullah <sup>1,2,\*</sup> and Parameswari Namasivayam <sup>3</sup>

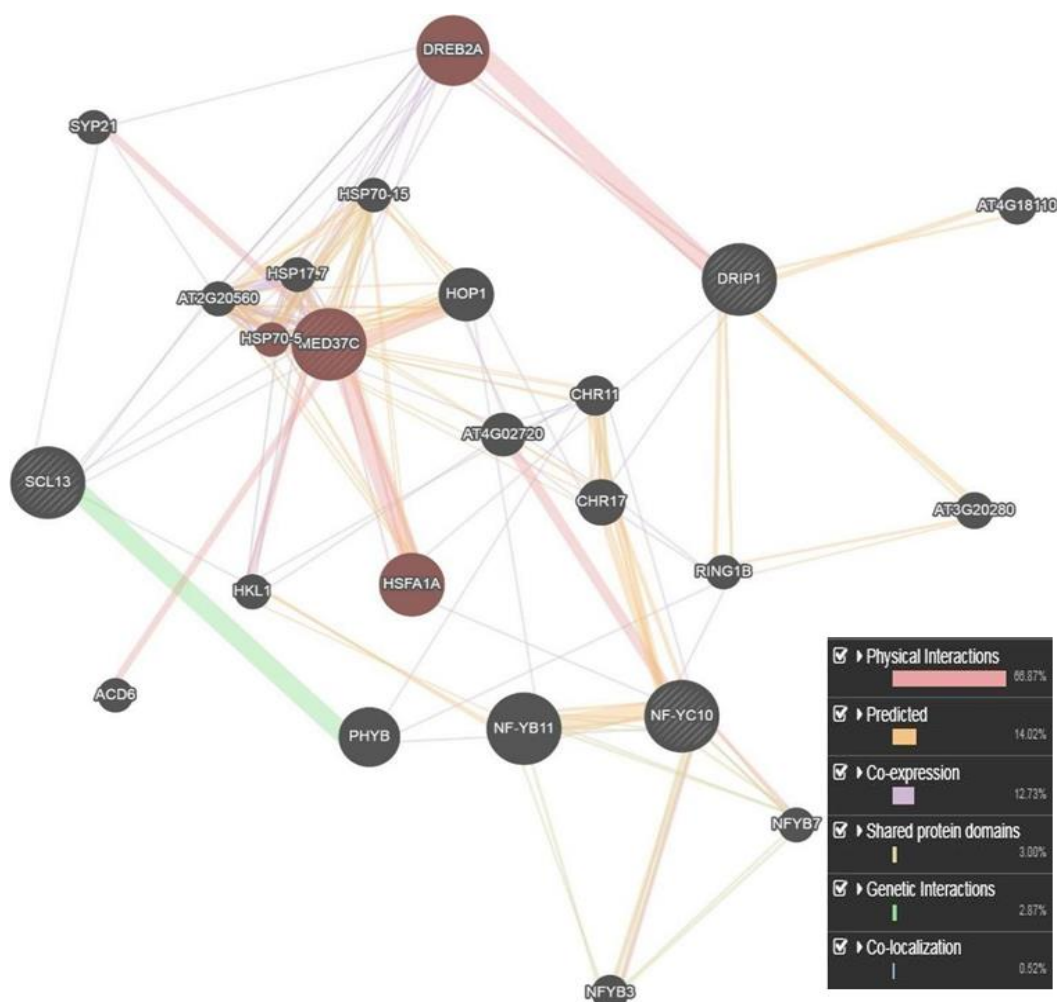

**Figure S1.** Gene interaction network in *Arabidopsis* for the genes of interest used for the gene expression study in this work. The network was generated by the GeneMANIA prediction server [44]. The right panel presents the different types of interactions with respective color coding, depicted with lines connecting genes in the network: physical interactions (pink), predicted (orange), co-expression (purple) and shared protein domains. Red-filled circles considered heat-shock protein binding.
